# Supplementary material
Source: HighWire-hosted journal article supplement (https://sti.bmj.com/content/93/3/162)
Supplement: inline-supplementary-material-1 [file inline-supplementary-material-1.pdf]

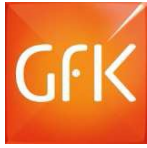

**Appendix A: Questionnaire – Main Survey**

**Study Title: Pubic Hair Grooming Behaviors among American Men and Women**

Q1. On a scale from 1 to 7.....

|                                              |   |                  |   |   |   |                   |   |   |   |            |   |
|----------------------------------------------|---|------------------|---|---|---|-------------------|---|---|---|------------|---|
| Currently do not have a partner / Don't know | 0 | Not at all hairy | 1 | 2 | 3 | Average hairiness | 4 | 5 | 6 | Very hairy | 7 |
|----------------------------------------------|---|------------------|---|---|---|-------------------|---|---|---|------------|---|

a. How hairy are you?

b. How hairy is your partner?

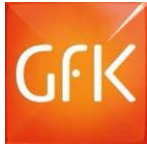

Images adapted from Ramsey S, Sweeney C, Fraser M, and Oades G. Pubic hair and sexuality: A review. J Sex Med 2009;6:2102–2110.

Q2. Please select the image below which best represents your natural hair pattern.

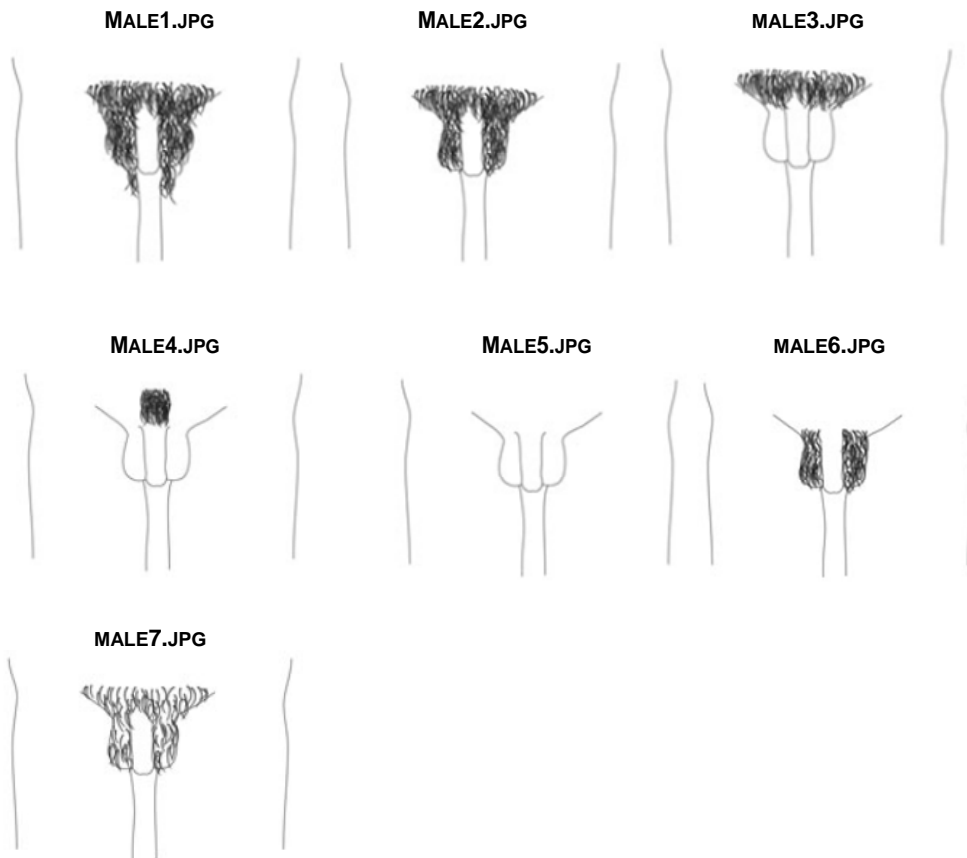



FEMALE1.JPG

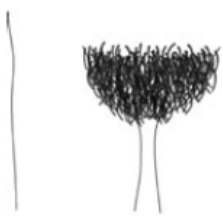

FEMALE2.JPG

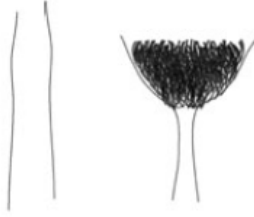

FEMALE3.JPG

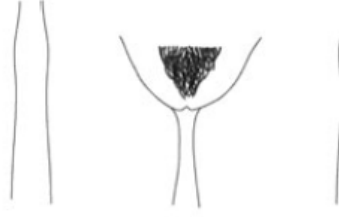

FEMALE4.JPG

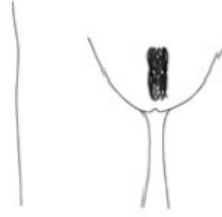

FEMALE5.JPG

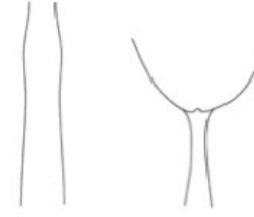

FEMALE6.JPG

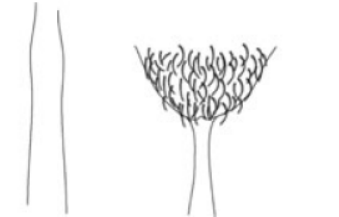



Q2a. Please select the image below which represents your ideal female hair pattern.

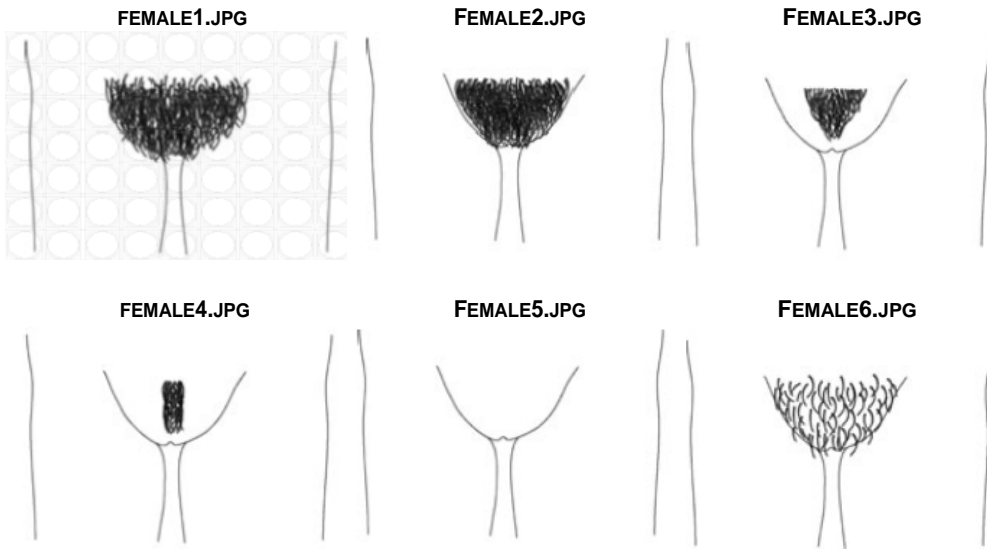



[SP; SHOW RADIO BUTTON BELOW EACH IMAGE]

Q2b. Please select the image below which represents your ideal male hair pattern.

MALE1.JPG

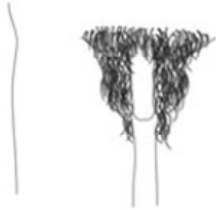

MALE2.JPG

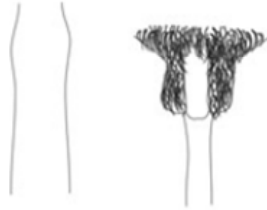

MALE3.JPG

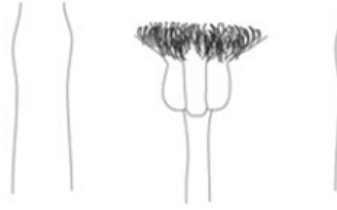

MALE4.JPG

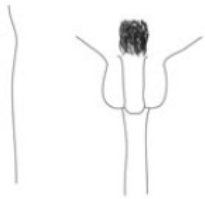

MALE5.JPG

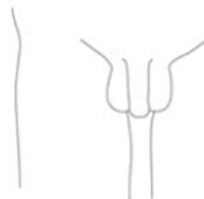

MALE6.JPG

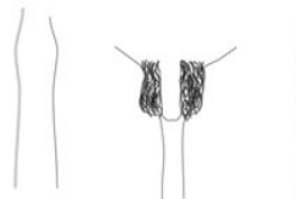

MALE7.JPG

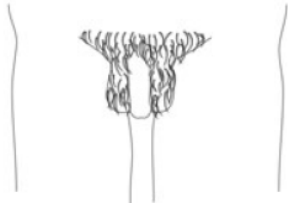

Q3. Have you ever removed or trimmed your pubic hair?

1. Yes
2. No

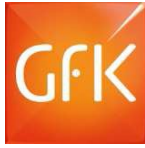

Q4. Have you removed some (not all) of your pubic hair over the last year?

1. Not at all
2. 1 time
3. 2-5 times
4. 6-10 times
5. 11+ times

Q5a. How regularly do you groom (remove or trim) your pubic hair?

1. Daily
2. Weekly
3. Monthly
4. Every 3-6 months
5. Every year
6. I do not groom regularly

Q6a. Please select any and all events that you have trimmed or removed your pubic hair for.  
You may select more than one.

1. Sex
2. Trip to the doctor
3. Vacation
4. Other (please list) **[TEXT]**
5. I have never trimmed or removed my pubic hair for events. **[SP]**

Q7. Have you ever removed all your pubic hair?

1. Not at all
2. 1 time
3. 2-5 times
4. 6-10 times
5. 11+ times



Q9. What modes of pubic hair removal have you used?

1. Non electric blade razor with shaving cream
2. Non electric blade razor with soap
3. Electric razor with a guard
4. Electric razor without guard
5. Wax
6. Scissors
7. Electrolysis
8. Laser hair reduction
9. Other (please list) [TEXT]

Q8. What is the mode of pubic hair removal that you most often use?

1. Non electric blade razor with shaving cream
2. Non electric blade razor with soap
3. Electric razor with a guard
4. Electric razor without guard
5. Wax
6. Scissors
7. Electrolysis
8. Laser hair reduction
9. Other (please list) [TEXT]

Q10. Who performs your pubic hair grooming?

1. Self
2. Partner
3. Friend
4. Professionally done
5. Other (please list) [TEXT]

Q11. What position(s) do you groom in?

1. Squatting
2. Sitting
3. Laying on back
4. Standing
5. Other (please list) [TEXT]



Q12. Do you groom by direct visualization (either mirror or looking at the area) of the area you are grooming?

1. Mirror
2. Direct visualization of genitals
3. Don't look, just feel

Q13a. Areas that I groom:

1. Hair above penis
2. Penile shaft
3. Hair from penis to navel ("happy trail")
4. Scrotum
5. Inner thighs
6. Hair between scrotum and anus
7. Hair around anus
8. Buttocks

Q13b. Areas that I groom:

1. Hair above vagina
2. Hair around vagina
3. Hair below belly button
4. Inner thighs
5. Hair around anus
6. Buttocks
7. Hair between vagina and anus

Q14. How old were you when you first started pubic hair grooming?

Q15. Who introduced you to pubic hair grooming?

1. Friend
2. Partner
3. Myself
4. Saw on TV/movie/magazine
5. Other (please list) [TEXT]





Q16. Why do you groom your pubic hair?

1. Part of grooming routine
2. Hygienic/cleaner
3. Partner prefers this
4. **[INSERT IF PPGENDER=1: Makes my penis look longer / INSERT IF PPGENDER=2: Makes my vagina look nicer]**
5. Oral sex is easier
6. Anal sex is easier
7. History of pubic lice/STI
8. Other (please list) **[TEXT]**

Q17. Have you ever had a pubic hair grooming related injury such as a cut, burn, rash, laceration with blood, injury requiring medical care, infection, abscess, other not listed?

1. Yes
2. No

Q18. What grooming instrument were you using when you were injured? (If you have been injured more than once, please select all instruments that apply.)

1. Non electric blade razor with shaving cream
2. Non electric blade razor with soap
3. Electric razor with a guard
4. Electric razor without guard
5. Wax
6. Scissors
7. Electrolysis



8. Laser hair reduction
9. Other (please list) [TEXT]

Q19. How long had you been performing pubic hair grooming before you were injured? (If you have been injured more than once, please list the duration of time you have been grooming for each injury.)

- [INSERT Q18] year(s) [RANGE: 0-65]  
[INSERT Q18] year(s) [RANGE: 0-65]  
[INSERT Q18] year(s) [RANGE: 0-65]

Q20. What was your pubic hair grooming injury? (If you have been injured more than once, please select all injuries that apply.)

1. Burn
2. Rash
3. Laceration with blood
4. Injury requiring medical care
5. Infection
6. Abscess
7. Other (please list) [TEXT]

Q21. Where were you injured? (If you have been injured more than once, please select all locations that apply.)

1. [INSERT IF PPGENDER=1: Scrotum / INSERT IF PPGENDER=2: Labia majora]
2. [INSERT IF PPGENDER=1: Penis / INSERT IF PPGENDER=2: Labia minora]
3. Anus
4. Perineum (area between the [INSERT IF PPGENDER=1: penis / INSERT IF PPGENDER=2: vagina] and anus)
5. Inner thigh
6. Pubis (area above [INSERT IF PPGENDER=1: penis / INSERT IF PPGENDER=2: vagina])
7. Other (please list) [TEXT]

Q22. Have you ever sought or needed medical treatment for a pubic hair grooming injury?

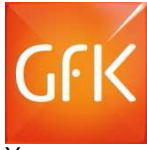

1. Yes
2. No

Q23. Have you experienced a pubic hair grooming injury more than once?

1. Yes
2. No



Q24. Have you ever required antibiotics for a pubic hair grooming injury?

1. Yes
2. No

Q25. Have you ever required a surgical procedure for a pubic hair grooming injury including abscess drainage, stitches other intervention?

1. Yes
2. No

Q26. Do you have a history of skin infections/abscesses anywhere on your body?

1. Yes
2. No

Q27. Have you ever been diagnosed with a bacterial infection called MRSA (Methicillin resistant Staphalacoccus Aureus)?

1. Yes
2. No

Q28. In the last 6 months have you...?

1. Worked in a hospital
2. Been hospitalized
3. Worked in a nursing home or long care facility
4. Been admitted to a nursing home or long care facility
5. Participated in contact sports
6. Participate in a military training camp or lived in military barracks
7. Worked in a jail or prison
8. Been imprisoned or jailed
9. Worked in a child care or day care center
10. None of the above **[SP]**



Q29. Do you have (a) regular sexual partner/partners?

1. Yes
2. No



Q30. Does/Do your partner(s) prefer your pubic hair to be groomed?

1. Yes
2. No
3. Unsure
4. Unsure but I think they do

Q31. Do you prefer your sexual partner(s) to perform pubic hair grooming?

1. Yes
2. No
3. Doesn't matter
4. I'm not sexually active

Q32. How many times per week does someone other than yourself see you naked?

Q33a. How satisfied are you on a scale from 1-7 with your...

| Extremely<br>dissatisfied | Very<br>dissatisfied | Somewhat<br>dissatisfied | No feeling<br>one way<br>or the<br>other | Somewhat<br>satisfied | Very<br>satisfied | Extremely<br>satisfied |
|---------------------------|----------------------|--------------------------|------------------------------------------|-----------------------|-------------------|------------------------|
| 1                         | 2                    | 3                        | 4                                        | 5                     | 6                 | 7                      |

- a. Length of erect penis
- b. Girth of erect penis
- c. Size of flaccid penis
- d. Color of genitals
- e. Shape of glans (head)
- f. Location of urethra
- g. Texture of skin
- h. Curvature of penis
- i. Circumcision status
- j. Size of testicles



- k. Genital veins
- l. Amount of pubic hair
- m. Amount of semen
- n. Scent of genitals

Q33b. On a scale from 1-7, how much do you agree or disagree with the following statements?

|                      |   |   |          |         |       |   |                   |
|----------------------|---|---|----------|---------|-------|---|-------------------|
| Strongly<br>disagree |   |   | Disagree | Neutral | Agree |   | Strongly<br>agree |
| 1                    | 2 | 3 | 4        | 5       | 6     | 7 |                   |

- a. I feel positively about my genitals.
- b. I am satisfied with the appearance of my genitals.
- c. I would feel comfortable letting a sexual partner look at my genitals.
- d. I think my genitals smell fine.
- e. I think my genitals work the way they are supposed to work.
- f. I feel comfortable letting a healthcare provider examine my genitals.
- g. I am not embarrassed about my genitals.

Q34. On a scale from 1-7, how much do you agree or disagree with the following statements?

|                      |   |   |          |         |       |   |                   |
|----------------------|---|---|----------|---------|-------|---|-------------------|
| Strongly<br>disagree |   |   | Disagree | Neutral | Agree |   | Strongly<br>agree |
| 1                    | 2 | 3 | 4        | 5       | 6     | 7 |                   |

- a. I groom because my partner expects it.
- b. Sex is better when I groom.
- c. My [INSERT IF PPGENDER=1: penis looks longer / INSERT IF PPGENDER=2: vagina looks better] when I groom.
- d. I [INSERT IF PPGENDER=1: look better / INSERT IF PPGENDER=2: feel sexier] when I groom.
- e. I feel younger when I groom.
- f. I'm embarrassed if people see me when I HAVE groomed.
- g. I'm embarrassed if people see me when I have NOT groomed.
- h. Most [INSERT IF PPGENDER=1: men / INSERT IF PPGENDER=2: women] groom their pubic hair.

Q35. Are you sexually active with...?

- 1. Men

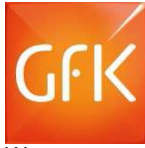

2. Women
3. Both
4. Not sexually active

Q36a. Sexual activities you have engaged in over the last year:

1. Penetrative vaginal sex
2. Penetrative anal sex
3. Performed oral genital sex (felatio/"blowjob" or cunnilingus)
4. Received oral genital sex (felatio or "blowjob")
5. Received anal sex
6. Performed oral anal sex (analingus or "rimming")
7. Received oral anal sex (analingus or "rimming")

Q36b. Sexual activities you have engaged in over the last year:

1. Receptive vaginal sex
2. Receptive anal sex
3. Performed oral genital sex (felatio/"blowjob" or cunnilingus)
4. Received oral genital sex (cunnilingus)
5. Performed oral anal sex (analingus or "rimming")
6. Received oral anal sex (analingus or "rimming")

Q37. Frequency of sexual activity:

1. Daily
2. 1 – 3 times per week
3. Monthly
4. Every 3 months or less often





Q38. Number sexual partners in the last year:

Q39. Number sexual partners in your lifetime:

Q40. Have you ever had this skin condition called molluscum contagiosum?

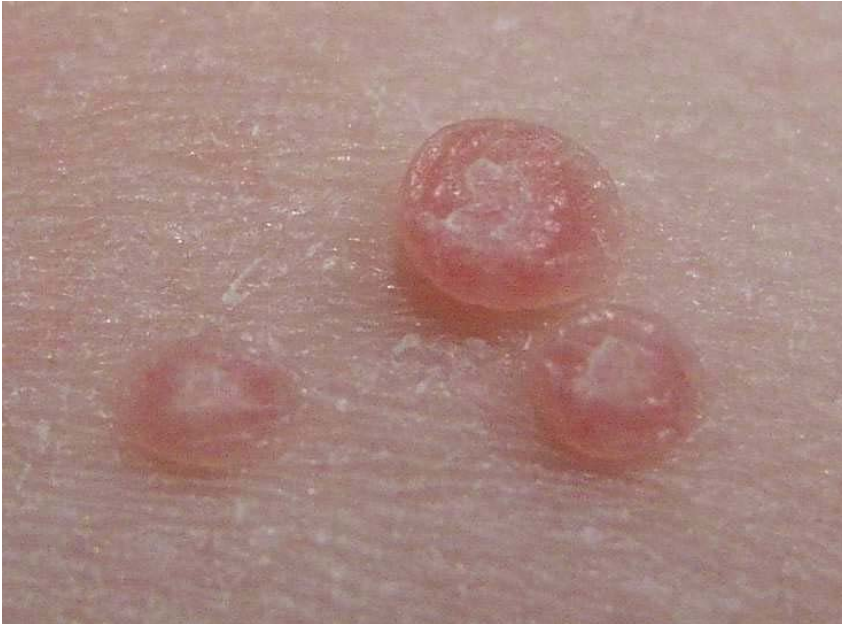

1. Yes
2. No



Q41. Have you ever contracted a sexually transmitted disease?

1. Yes
2. No

Q42. What is the total number of STDs that you have had in your lifetime?

1. 1
2. 2-3
3. 4-6
4. 7-10
5. Greater than 10

Q42a. Do you or have you ever had the following infections?

1. Human immunodeficiency virus (HIV)
2. Chlamydia
3. Gonorrhea
4. Syphilis
5. Human papilloma virus (HPV)
6. Genital herpes (HSV)
7. Vaginal warts
8. Anal warts
9. Lice (crabs)
10. Molluscum contagiosum
11. None of the above **[SP]**

Q43. Were you performing pubic hair grooming at the time of your STD infection?

1. Yes
2. No
3. Unsure

Q44. What method(s) of hair removal were you using at the time of your STD infection?

4. Non electric blade razor with shaving cream.



5. Non electric blade razor with soap
6. Electric razor with a guard
7. Electric razor without guard
8. Wax
9. Scissors
10. Electrolysis
11. Laser hair reduction
12. Other (please list) **[TEXT]**
